# Supplementary material for: Pharmacokinetic/pharmacodynamic analysis of adjuvant pegylated interferon α-2b in patients with resected high-risk melanoma
Source: PubMed Central journal article supplement — Cancer Chemother Pharmacol. 2010 May 28;67(3):657–66. doi: 10.1007/s00280-010-1326-9 (PMC3043235; doi:10.1007/s00280-010-1326-9), 2010-05-28
Supplement: 280_2010_1326_MOESM2_ESM.pdf [file 280_2010_1326_MOESM2_ESM.pdf]

**Pharmacokinetic/pharmacodynamic analysis of adjuvant pegylated interferon  $\alpha$ -2b in patients with resected high-risk melanoma**

**Journal:** Cancer Chemotherapy and Pharmacology

A. I. Daud, C. Xu, W.-J. Hwu, P. Urbas, S. Andrews, N. E. Papadopoulos, L. C. Floren, A. Yver, R. C. DeConti, V. K. Sondak

**Corresponding author:** Adil Daud, MD, University of California San Francisco, San Francisco, CA 94143, USA; e-mail: [adaud@medicine.ucsf.edu](mailto:adaud@medicine.ucsf.edu)

**ONLINE RESOURCE MATERIAL: SUPPLEMENTARY TABLE 1**

| Parameter                                                                             | Estimate of geometric mean (N=32) | %CV   |
|---------------------------------------------------------------------------------------|-----------------------------------|-------|
| <b>One-compartmental PK model parameters for peginterferon <math>\alpha</math>-2b</b> |                                   |       |
| V/F (l/kg)                                                                            | 1.08                              | 38%   |
| K01 (h <sup>-1</sup> )                                                                | 0.161                             | 83%   |
| K10 (h <sup>-1</sup> )                                                                | 0.0137                            | 35%   |
| <b>Imax model parameters (pooled data, n=3 to 32)</b>                                 |                                   |       |
| E0                                                                                    | 98.7%                             | 3.8%  |
| I <sub>max</sub>                                                                      | 33.3%                             | 11.5% |
| IC <sub>50</sub> (pg*hr/mL)                                                           | 80,900                            | 28.2  |
| R                                                                                     | 0.986                             |       |
| AIC                                                                                   | 46.0                              |       |

| PD parameters of the ANC PK/PD model                          |                                          |      |
|---------------------------------------------------------------|------------------------------------------|------|
| Parameter                                                     | Estimate of<br>geometric mean<br>(N=31*) | %CV  |
| K <sub>in</sub> (day <sup>-1</sup> )                          | 57.9                                     | 145% |
| K <sub>out</sub> (day <sup>-1</sup> )                         | 0.526                                    | 150% |
| IC <sub>50</sub> (pg/mL)                                      | 453                                      | 84%  |
| *One subject discontinued without sufficient PD data to model |                                          |      |

AIC, Akaike's information criteria; ALT, alanine aminotransferase; ANC, absolute neutrophil count; CV, coefficient of variation; E0, baseline effect; IC<sub>50</sub>, plasma concentration at 50% of I<sub>max</sub>; I<sub>max</sub>, maximum drug inhibitory effect; K01, absorption rate; K10, elimination rate; K<sub>in</sub>, input or production rate; K<sub>out</sub>, output (loss or elimination) rate; PD, pharmacodynamic; PK, pharmacokinetic; R, accumulation factor; SC<sub>50</sub>, peginterferon α-2b concentration producing 50% of S<sub>max</sub>; S<sub>max</sub>, maximum effect by peginterferon α-2b; V/F, apparent volume of distribution; γ, Hill coefficient.

The neutrophil data were described using the following equation:

$$dR/dt = K_{in} * [1 - (Cp/Cp + IC_{50})] - K_{out} * R$$

The ALT data were described using the following equation:

$$dR/dt = K_{in} * [1 + (S_{max} * Cp^{**\gamma}) / (SC_{50}^{**\gamma} + Cp^{**\gamma})] - K_{out} * R$$
