# Supplementary material for: Pharmacokinetic/pharmacodynamic analysis of adjuvant pegylated interferon α-2b in patients with resected high-risk melanoma
Source: PubMed Central journal article supplement — Cancer Chemother Pharmacol. 2010 May 28;67(3):657–66. doi: 10.1007/s00280-010-1326-9 (PMC3043235; doi:10.1007/s00280-010-1326-9), 2010-05-28

## Pharmacokinetic/pharmacodynamic analysis of adjuvant pegylated interferon $\alpha$ -2b in patients with resected high-risk melanoma

**Journal:** Cancer Chemotherapy and Pharmacology

A. I. Daud, C. Xu, W.-J. Hwu, P. Urbas, S. Andrews, N. E. Papadopoulos, L. C. Floren, A. Yver, R. C. DeConti, V. K. Sondak

**Corresponding author:** Adil Daud, MD, University of California San Francisco, San Francisco, CA 94143, USA; e-mail: [adaud@medicine.ucsf.edu](mailto:adaud@medicine.ucsf.edu)

### ONLINE RESOURCE MATERIAL: SUPPLEMENTARY FIGURE 1

Goodness-of-fit plots **of one representative individual** for the absolute neutrophil count (ANC) pharmacokinetic/pharmacodynamic (PK/PD) model.

**a** Observed and predicted median ANC (percentage of baseline) vs time

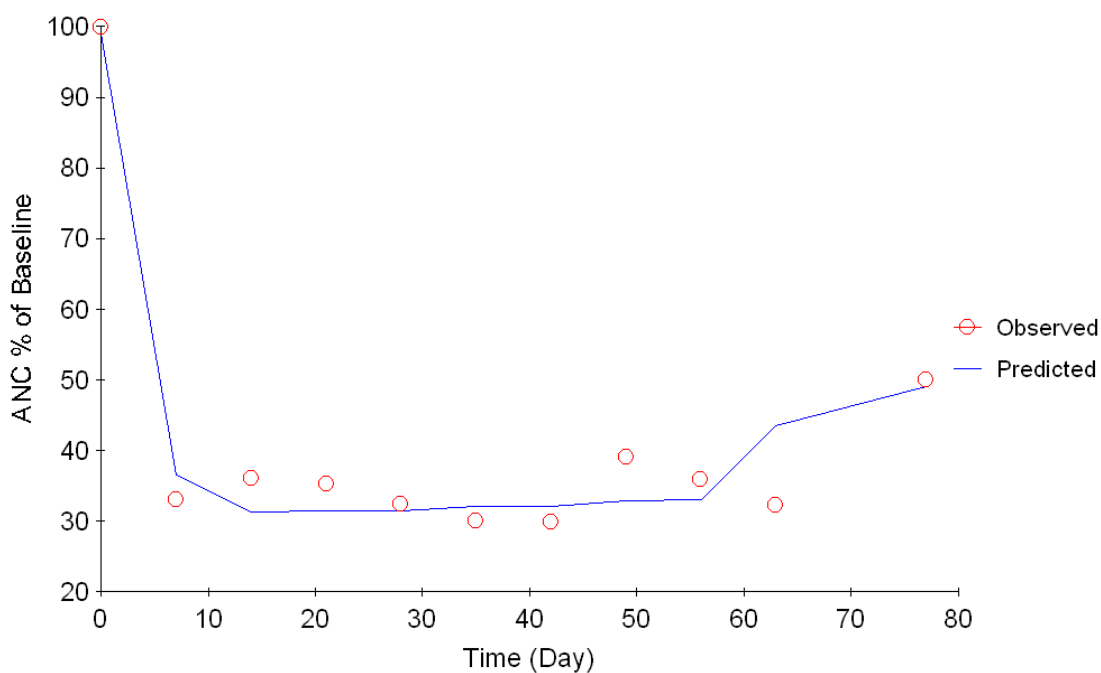

**b** Weighted predicted vs observed median ANC (percentage of baseline)

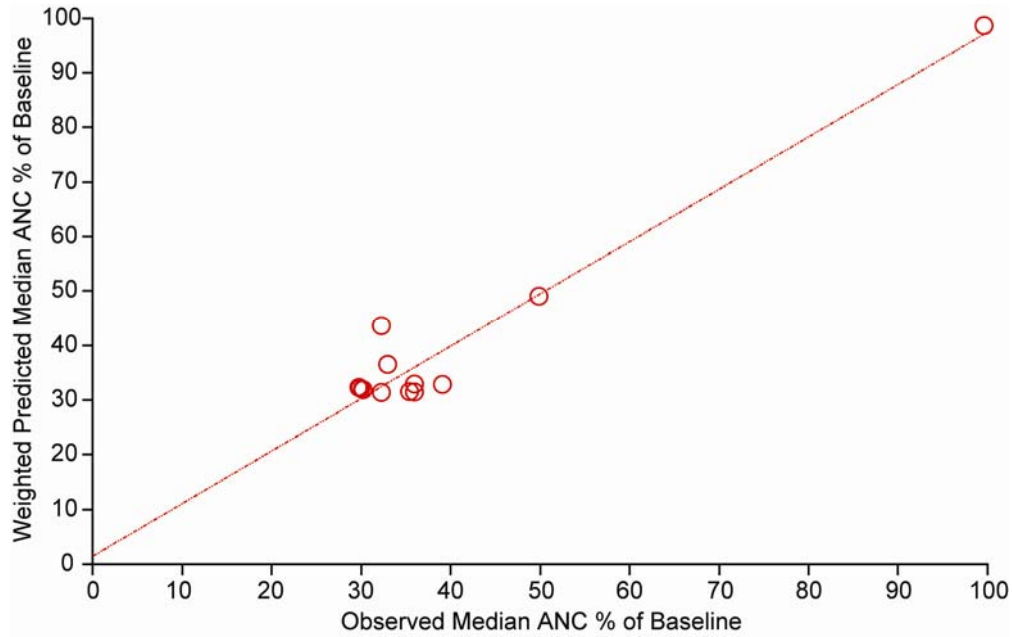

**c** Weighted residual of predicted median ANC (percentage of baseline) vs weighted predicted median ANC (percentage of baseline): weighted residual vs Y

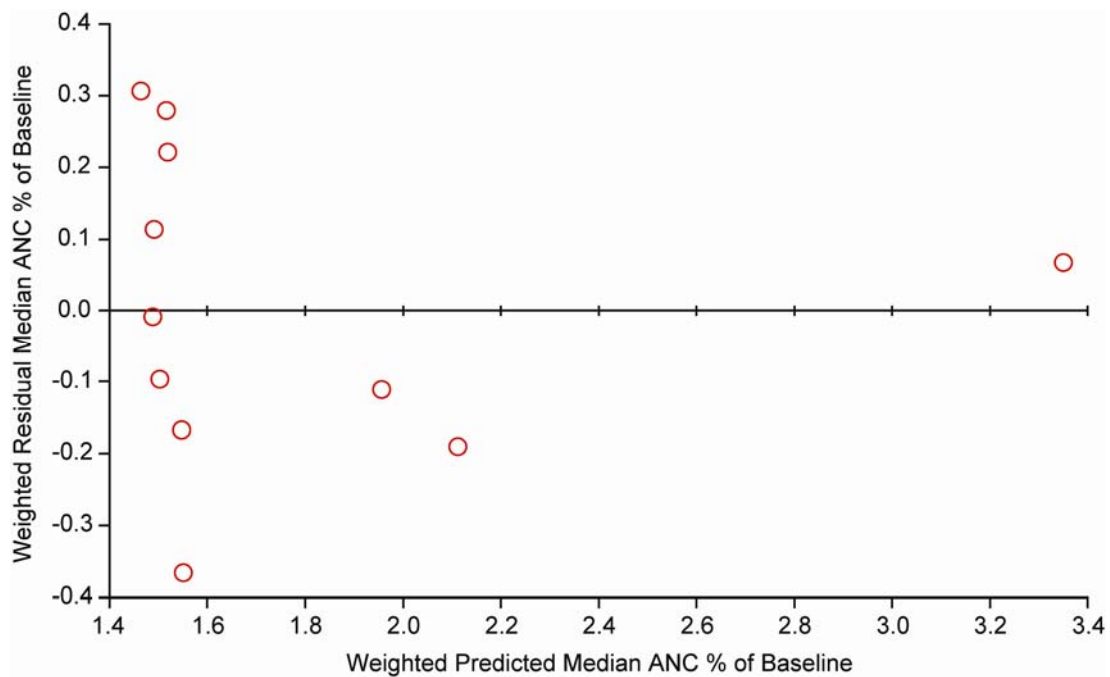

**d** Weighted residual of predicted median ANC (percentage of baseline) vs time (day): weighted residual vs X

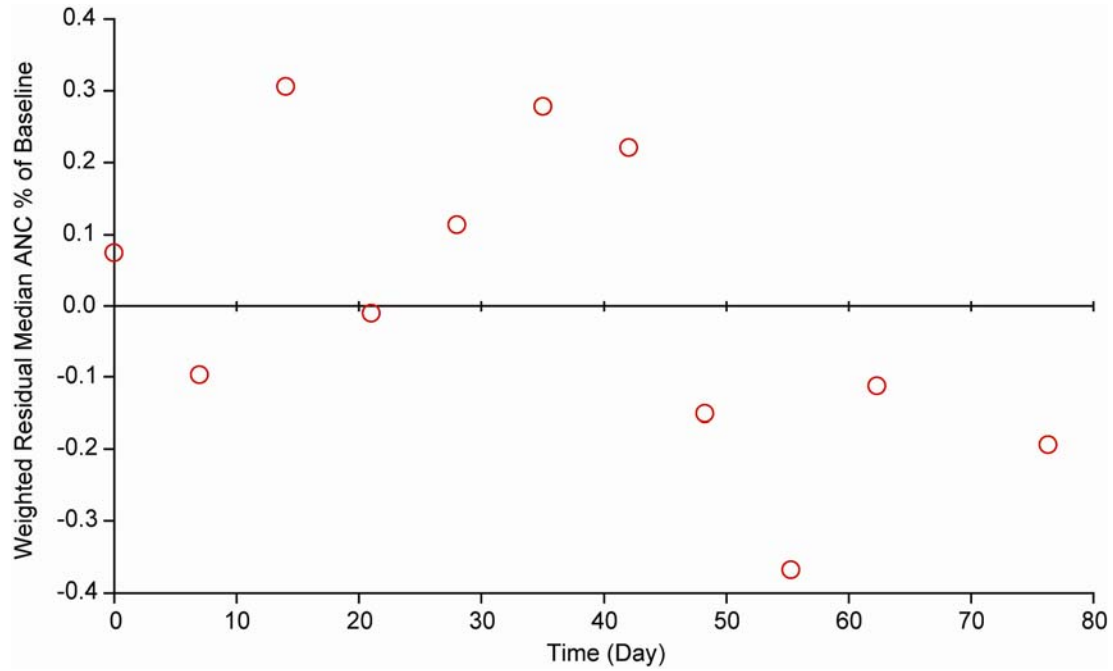

Supplement: 280_2010_1326_MOESM3_ESM.pdf [file 280_2010_1326_MOESM3_ESM.pdf]
